# Supplementary material
Source: PubMed Central journal article supplement (PMC6815244)
Supplement: NIHMS1532535-supplement-1.pdf [file NIHMS1532535-supplement-1.pdf]

**Table S1. Dialysis Patient Participant Characteristics in the Per Education Protocol Subgroup (n=369)**

|                                                                                   | ETH-EG<br>(n=101) | ETH-PG<br>(n=108) | SOC<br>(n=160) | p-value |
|-----------------------------------------------------------------------------------|-------------------|-------------------|----------------|---------|
| Race                                                                              |                   |                   |                | 0.6     |
| Black                                                                             | 67%               | 74%               | 71%            |         |
| White                                                                             | 33%               | 26%               | 29%            |         |
| Sex: Female                                                                       | 53%               | 49%               | 47%            | 0.6     |
| Age (mean, sd)                                                                    | 53 (12)           | 53 (9)            | 53 (9)         | 0.9     |
| Etiology of ESRD: PKD                                                             | 34%               | 34%               | 31%            | 0.6     |
| Education level                                                                   |                   |                   |                | 0.7     |
| High school diploma or less                                                       | 56%               | 48%               | 54%            |         |
| Some college                                                                      | 30%               | 36%               | 29%            |         |
| College graduate or higher                                                        | 14%               | 16%               | 17%            |         |
| Health insurance                                                                  |                   |                   |                | 0.6     |
| Medicare (National medical card)                                                  | 91%               | 93%               | 85%            |         |
| Medicaid (State medical card)                                                     | 7%                | 4%                | 10%            |         |
| Private insurance (HMO or PPO)                                                    | 1%                | 2%                | 3%             |         |
| Other insurance                                                                   | 1%                | 1%                | 2%             |         |
| Source of income <sup>b</sup>                                                     |                   |                   |                |         |
| Full-time employment                                                              | 1%                | 2%                | 0.6%           | 0.6     |
| Retirement savings/pension                                                        | 4%                | 4%                | 4%             | 0.9     |
| Social Security (Retirement)                                                      | 36%               | 26%               | 25%            | 0.2     |
| Disability due to kidney disease                                                  | 60%               | 63%               | 71%            | 0.2     |
| Disability due to other causes                                                    | 24%               | 32%               | 23%            | 0.8     |
| If family lost current income, how long could you live in your current situation? |                   |                   |                | 0.07    |
| <1 month                                                                          | 47%               | 45%               | 35%            |         |
| 1-6 months                                                                        | 35%               | 25%               | 38%            |         |
| >7 months                                                                         | 18%               | 30%               | 26%            |         |
| Dialysis Type                                                                     |                   |                   |                | 0.4     |
| Hemodialysis                                                                      | 90%               | 94%               | 94%            |         |
| Peritoneal dialysis                                                               | 10%               | 6%                | 6%             |         |
| Years on dialysis (median, IQR)                                                   | 3 (1-6)           | 5 (3-7)           | 3 (1-8)        | 0.6     |
| Preferred mode of communication                                                   |                   |                   |                | 0.2     |
| Phone                                                                             | 99%               | 92%               | 94%            |         |
| Mail                                                                              | 0%                | 2%                | 1%             |         |
| Email                                                                             | 1%                | 2%                | 3%             |         |
| Text message                                                                      | 0%                | 6%                | 2%             |         |
| Previously read transplant brochures                                              | 74%               | 81%               | 81%            | 0.4     |
| Watched transplant videos                                                         | 26%               | 40%               | 30%            | 0.07    |
| How often requires help reading hospital materials                                |                   |                   |                | 0.2     |
| Never                                                                             | 51%               | 60%               | 49%            |         |
| Any time                                                                          | 49%               | 40%               | 51%            |         |
| Has needed social support                                                         | 72%               | 81%               | 81%            | 0.2     |
| Medical mistrust <sup>c</sup> (mean, sd)                                          | 2.7 (0.6)         | 2.7 (0.7)         | 2.9 (0.6)      | 0.08    |
| CDC HRQOL-4                                                                       |                   |                   |                |         |
| General health <sup>d</sup> (mean, sd)                                            | 3.3 (1.0)         | 3.4 (1.0)         | 3.5 (1.0)      | 0.5     |

<sup>a</sup>The "randomized" sample refers to the intent-to-treat sample in this paper's analyses.

<sup>b</sup>Patients could check all appropriate options, so percentages down columns do not sum to 100%.

<sup>c</sup>Score ranges from 1-4, with higher scores reflecting higher medical mistrust.

<sup>d</sup>Score ranges from 0-5, with higher scores reflecting higher health-related quality of life.

ITT: intent-to-treat; ETH-EG: Explore Transplant @ Home – Educator-Guided; ETH-PG: Explore Transplant @ Home – Patient-Guided; SOC: standard-of-care; ESRD: end stage renal disease; PKD: polycystic kidney disease; IQR: interquartile range; sd: standard deviation; HRQOL: health-related quality of life

| <b>Table S2. Difference-in-Differences Analysis of Pre- to Post-Change between Educational Conditions in Transplant Knowledge, LDKT Attitudes, and DDKT Attitudes in the Per Education Protocol Subgroup (n=369)</b> |                |      |      |                |      |      |             |      |      |                                        |                             |
|----------------------------------------------------------------------------------------------------------------------------------------------------------------------------------------------------------------------|----------------|------|------|----------------|------|------|-------------|------|------|----------------------------------------|-----------------------------|
|                                                                                                                                                                                                                      | ETH-EG (n=101) |      |      | ETH-PG (n=108) |      |      | SOC (n=160) |      |      | Difference-in-Differences <sup>a</sup> |                             |
|                                                                                                                                                                                                                      | Pre            | Post | Diff | Pre            | Post | Diff | Pre         | Post | Diff | ET-EG vs SOC                           | ET-PG vs SOC                |
| Transplant Knowledge                                                                                                                                                                                                 | 7.1            | 8.6  | +1.6 | 7.2            | 8.8  | +1.6 | 7.2         | 8.0  | +0.8 | 0.7 (0.3),<br><b>p=0.02</b>            | 0.8 (0.3),<br><b>p=0.01</b> |
| LDKT Pros                                                                                                                                                                                                            | 24.0           | 25.0 | +1.0 | 25.7           | 25.7 | 0    | 25.5        | 25.0 | -0.5 | 1.5 (0.6),<br><b>p=0.01</b>            | 0.5 (0.6),<br>p=0.5         |
| LDKT Cons                                                                                                                                                                                                            | 20.6           | 19.6 | -1.0 | 19.6           | 19.5 | -0.1 | 19.9        | 20.0 | +0.1 | -1.1 (0.8),<br>p=0.2                   | -0.2 (0.8),<br>p=0.8        |
| LDKT Self-Efficacy                                                                                                                                                                                                   | 21.0           | 21.1 | +0.1 | 23.1           | 22.6 | -0.5 | 22.5        | 20.9 | -1.6 | 1.7 (1.0),<br>p=0.08                   | 1.1 (1.0),<br>p=0.2         |
| DDKT Pros                                                                                                                                                                                                            | 25.5           | 26.6 | +1.1 | 27.2           | 27.0 | -0.2 | 26.6        | 26.8 | -0.2 | 1.3 (0.5),<br><b>p=0.01</b>            | -0.01 (0.5),<br>p=0.9       |
| DDKT Cons                                                                                                                                                                                                            | 21.5           | 19.5 | -2.0 | 20.8           | 19.7 | -1.1 | 21.5        | 20.8 | -0.6 | -1.4 (0.8),<br>p=0.07                  | -0.5 (0.7),<br>p=0.5        |
| DDKT Self-Efficacy                                                                                                                                                                                                   | 31.2           | 31.9 | +0.7 | 33.7           | 33.0 | -0.7 | 33.4        | 32.2 | -1.2 | 1.8 (1.0),<br>p=0.05                   | 0.5 (0.9),<br>p=0.5         |

<sup>a</sup>Difference-in-differences b estimate (standard error)  
 LDKT: living donor kidney transplant; DDKT: deceased donor kidney transplant; ETH-EG: Explore Transplant @ Home – Educator-Guided; ETH-PG: Explore Transplant @ Home – Patient-Guided; SOC: standard-of-care

| <b>Table S3. Number of New Steps Taken from Pre- to Post-Survey in the Per Education Protocol Subgroup (n=369)</b> |                           |                            |                         |
|--------------------------------------------------------------------------------------------------------------------|---------------------------|----------------------------|-------------------------|
|                                                                                                                    | <b>ETH Patient-Guided</b> | <b>ETH Educator-Guided</b> | <b>Standard-of-Care</b> |
| N                                                                                                                  | 108                       | 101                        | 160                     |
| Pre, mean (median)                                                                                                 | 3.1 (2.0)                 | 2.6 (1.0)                  | 2.7 (2.0)               |
| New from pre-post, mean (median)                                                                                   | 2.1 (1.5)                 | 1.6 (1.0)                  | 1.6 (1.0)               |
| IRR <sup>a</sup> (95% CI)                                                                                          | 1.31 (1.07-1.60)          | 0.97 (0.78-1.21)           | Reference               |
| p-value                                                                                                            | <b>0.007</b>              | 0.8                        | -                       |

<sup>a</sup>Incident rate ratio from Poisson model

ETH: Explore Transplant @ Home
